# Supplementary material for: The Role of Greenery in Stress Reduction among City Residents during the COVID-19 Pandemic
Source: MDPI journal article supplement (doi:10.3390/ijerph20105832), 2023-05-16
Supplement: s1 [file s1]

Table 1. Content and characteristics of geosurvey questions

| The content of the question                                                                                                                                                                                                                                                                                                                                                                                                                                                                                                                                                                                                                                                                                                                                                                                                                                                                                                                                                                                                                                                                                                                                                                                                                                                                                                                                                                                                                                                                                                                                            | Type of an answer to the question                                                                                                                                                                                                                                         |
|------------------------------------------------------------------------------------------------------------------------------------------------------------------------------------------------------------------------------------------------------------------------------------------------------------------------------------------------------------------------------------------------------------------------------------------------------------------------------------------------------------------------------------------------------------------------------------------------------------------------------------------------------------------------------------------------------------------------------------------------------------------------------------------------------------------------------------------------------------------------------------------------------------------------------------------------------------------------------------------------------------------------------------------------------------------------------------------------------------------------------------------------------------------------------------------------------------------------------------------------------------------------------------------------------------------------------------------------------------------------------------------------------------------------------------------------------------------------------------------------------------------------------------------------------------------------|---------------------------------------------------------------------------------------------------------------------------------------------------------------------------------------------------------------------------------------------------------------------------|
| “What is the level of stress related to the COVID-19 pandemic that you perceive/ felt?”                                                                                                                                                                                                                                                                                                                                                                                                                                                                                                                                                                                                                                                                                                                                                                                                                                                                                                                                                                                                                                                                                                                                                                                                                                                                                                                                                                                                                                                                                | <ul style="list-style-type: none"> <li>– closed question,</li> <li>– a dichotomous slider on a scale from "0" to "10", where "0" meant "no stress" and "10" - "very high" level of stress</li> </ul>                                                                      |
| "How has your perceived level of stress changed due to the COVID-19 pandemic?"                                                                                                                                                                                                                                                                                                                                                                                                                                                                                                                                                                                                                                                                                                                                                                                                                                                                                                                                                                                                                                                                                                                                                                                                                                                                                                                                                                                                                                                                                         | <ul style="list-style-type: none"> <li>– closed question,</li> <li>– choice 1 out of 3 answers: "decreased", "no change", "increased".</li> </ul>                                                                                                                         |
| <p>„How stressful are you for you during the pandemic</p> <p>- please move the cursor on the axis:</p> <ul style="list-style-type: none"> <li>– the presence of the virus;</li> <li>– uncertainty regarding changes in the scope of restrictions (introduced overnight)</li> <li>– concern about limiting contact with family/ friends</li> <li>– concern of losing one's own job or that of another close relative</li> <li>– concern about the loss of part of the income</li> <li>– concern about price increases</li> <li>– concern about the need to provide childcare in the event of the closure of nurseries/schools/kindergartens</li> <li>– concern about being quarantined</li> <li>– concern about change of working mode to remote</li> <li>– concern about providing all household members with conditions for remote work/ learning (computer equipment, rooms)</li> <li>– concern about using public transport</li> <li>– closure of sports clubs, gyms, swimming pools and fitness clubs</li> <li>– closure of gastronomical facilities</li> <li>– closure of cultural and entertainment facilities (cinema, theatres, etc.)</li> <li>– restrictions on leaving apartments and using public spaces</li> <li>– difficulties in accessing health care (family doctor, specialist doctor, hospital treatment, etc.)</li> <li>– the need/ obligation to wear protective masks</li> <li>– concern about non-compliance with restrictions by other people</li> <li>– difficulties and risks related to movement (domestic/ international trips)”</li> </ul> | <ul style="list-style-type: none"> <li>– closed question,</li> <li>– evaluation of each of the proposals included in the list,</li> <li>– a dichotomous slider on a scale from "0" to "10", where "0" meant "no stress" and "10" - "very high" level of stress</li> </ul> |

|                                                                                                                                                  |                                                                                                                                                                                                                                                                                                                                                                                                                                                                                                                                                                                                                                                                                                                                                                                                                                                                                                                                                                                                                         |                                                                                                                                                                                                                                                                                                                                     |
|--------------------------------------------------------------------------------------------------------------------------------------------------|-------------------------------------------------------------------------------------------------------------------------------------------------------------------------------------------------------------------------------------------------------------------------------------------------------------------------------------------------------------------------------------------------------------------------------------------------------------------------------------------------------------------------------------------------------------------------------------------------------------------------------------------------------------------------------------------------------------------------------------------------------------------------------------------------------------------------------------------------------------------------------------------------------------------------------------------------------------------------------------------------------------------------|-------------------------------------------------------------------------------------------------------------------------------------------------------------------------------------------------------------------------------------------------------------------------------------------------------------------------------------|
| „Do you perceive/ feel any of the effects of excessive stress:                                                                                   | <ul style="list-style-type: none"><li>– weakness and general unwillingness to act;</li><li>– problems with concentration/ memory;</li><li>– anxiety attacks;</li><li>– sleep disorders;</li><li>– lack of appetite;</li><li>– compulsive eating;</li><li>– growing family conflicts;</li><li>– growing conflicts at work;</li><li>– growing neighbourly conflicts”</li></ul>                                                                                                                                                                                                                                                                                                                                                                                                                                                                                                                                                                                                                                            | <ul style="list-style-type: none"><li>– closed question,</li><li>– evaluation of each of the proposals included in the list,</li><li>– answers to choose from: "yes" or "no".</li></ul>                                                                                                                                             |
| "The use of which elements of the city structure increases the stress connected with the pandemic that you perceive/ feel, and which reduces it: | <ul style="list-style-type: none"><li>– public transport stops, stations</li><li>– small shops/ service points</li><li>– large shopping malls</li><li>– markets</li><li>– churches</li><li>– gyms, fitness clubs, swimming pools and other sports facilities</li><li>– outdoor recreation areas (outdoor gyms, sports fields, tennis courts, playgrounds, etc.)</li><li>– green areas (parks, recreational and leisure compact green areas, allotment gardens)</li><li>– cultural and entertainment facilities (cinema, theatres, clubs, discos)</li><li>– gastronomical facilities (cafes, restaurants, pubs)</li><li>– collective accommodation facilities (hotels, motels, guesthouses)</li><li>– public administration facilities (ZUS – Social Security Work, offices, municipal offices, town halls)</li><li>– health care facilities (clinics and doctor's offices, hospitals)</li><li>– public spaces - place, source (being among people)</li><li>– office spaces</li><li>– pandemic advertisements”</li></ul> | <ul style="list-style-type: none"><li>– closed question,</li><li>– evaluation of each of the proposals included in the list,</li><li>– answers to choose from: "reduces stress", "no change", "increases stress".</li></ul>                                                                                                         |
| "Please indicate on the map from 1 to 5 places where you relax or reduce the level of perceived stress."                                         |                                                                                                                                                                                                                                                                                                                                                                                                                                                                                                                                                                                                                                                                                                                                                                                                                                                                                                                                                                                                                         | <ul style="list-style-type: none"><li>– indicating on the interactive map of the city from 1 to 5 specific locations (green pin),</li><li>– for each indicated location (pins), a specific type of place (e.g. park, restaurant, gym) had to be specified in the empty field displayed next to it (next to map and pins).</li></ul> |

|                                                                                                                                                                                                                                                                                                                                                                                                                                                                                                                                                                                                                                                                                                                                                                                                                                                                                                                                                |                                                                                                                                                                                                                                                                                                                                      |
|------------------------------------------------------------------------------------------------------------------------------------------------------------------------------------------------------------------------------------------------------------------------------------------------------------------------------------------------------------------------------------------------------------------------------------------------------------------------------------------------------------------------------------------------------------------------------------------------------------------------------------------------------------------------------------------------------------------------------------------------------------------------------------------------------------------------------------------------------------------------------------------------------------------------------------------------|--------------------------------------------------------------------------------------------------------------------------------------------------------------------------------------------------------------------------------------------------------------------------------------------------------------------------------------|
| <p>"Please indicate on the map from 1 to 5 places that stress you or increase the stress you perceive/ feel related to the pandemic."</p>                                                                                                                                                                                                                                                                                                                                                                                                                                                                                                                                                                                                                                                                                                                                                                                                      | <ul style="list-style-type: none"> <li>- indicating on the interactive map of the city from 1 to 5 specific locations (red pin),</li> <li>- for each indicated location (pins), a specific type of place (e.g. park, restaurant, gym) had to be specified in the empty field displayed next to it (next to map and pins).</li> </ul> |
| <p>„What helps you reduce the level of stress you perceive/ feel during the pandemic:</p> <ul style="list-style-type: none"> <li>- vaccination against COVID-19</li> <li>- following news/information about the pandemic in the media (television, press, etc.)</li> <li>- undertaking/ continuing hobby activities (manual works, etc.)</li> <li>- direct contact with relatives (family, friends)</li> <li>- using social media,</li> <li>- watching movies, series, programs, etc.</li> <li>- staying in public spaces (among people)</li> <li>- contact with a pet</li> <li>- staying in a fitness club/gym</li> <li>- yoga/meditation</li> <li>- shopping in the mall/shopping centre</li> <li>- outdoor physical activity (walking, running, cycling, etc.)</li> <li>- staying among greenery (parks, gardens, green areas)</li> <li>- looking at greenery/water/nature,</li> <li>- working in the garden, caring for plants"</li> </ul> | <ul style="list-style-type: none"> <li>- closed question,</li> <li>- evaluation of each of the proposals included in the list,</li> <li>- answers to choose from: "yes" or "no".</li> </ul>                                                                                                                                          |
| <p>" In what directions should the city change to make it more resident friendly (reducing their stress) in the event of future pandemics?:</p> <ul style="list-style-type: none"> <li>- built-up areas vs. green areas (parks, boulevards),</li> <li>- un arranged greenery (forests, meadows) vs. arranged greenery (parks, , recreational and leisure compact green areas, squares, boulevards)"</li> </ul>                                                                                                                                                                                                                                                                                                                                                                                                                                                                                                                                 | <ul style="list-style-type: none"> <li>- closed question,</li> <li>- - dichotomous slider on a 10-point scale.</li> </ul>                                                                                                                                                                                                            |
